# Supplementary material
Source: Springer Nature journal article supplement (https://www.springermedizin.de/resource/supplementary/13075_2010_2979_MOESM5_ESM.pdf/9693484)

**A**

Saline

Isotype control

TLR-3

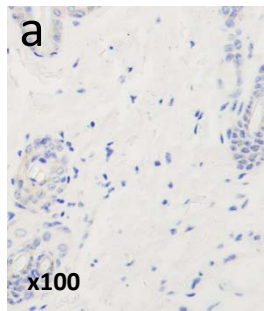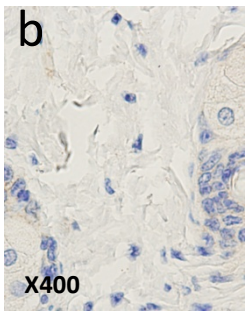

Bleomycin

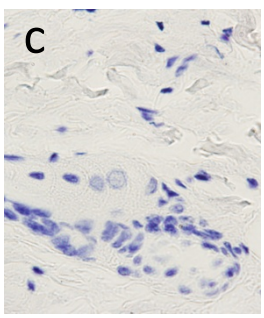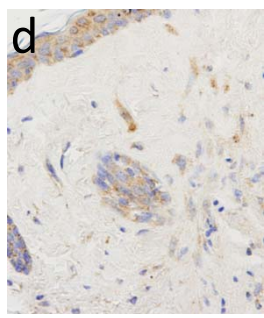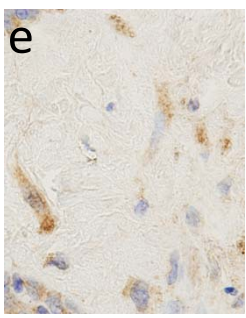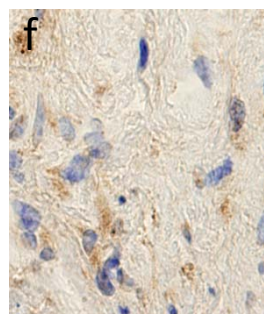**B**

Normal

Isotype control

TLR-3

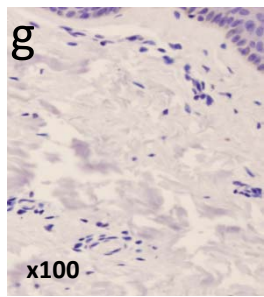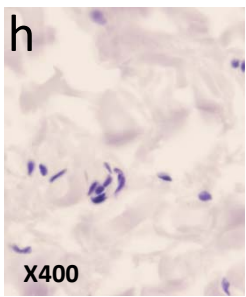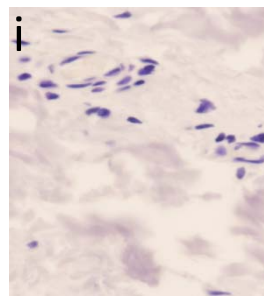

Scleroderma

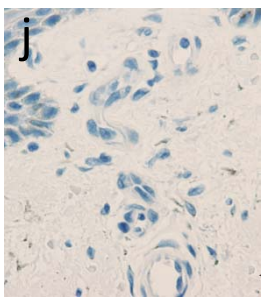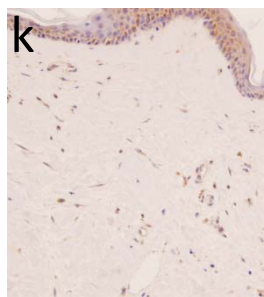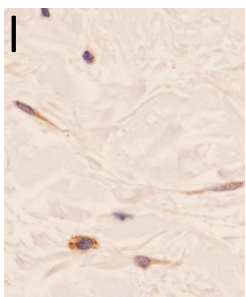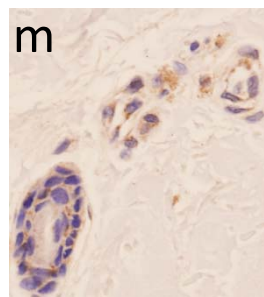

Supplement: MOESM5 [file 9693484]
